# Supplementary material
Source: publisher figshare collection journal article supplement (https://acs.figshare.com/ndownloader/files/3626097)

# **Nucleation Probability Distributions of Methane-Propane Mixed Gas Hydrates in Salt Solutions and Urea**

**Barbara Sowa<sup>a,b</sup>, Xue Hua Zhang<sup>c</sup>, Karen A. Kozielski<sup>d</sup>, Patrick G. Hartley<sup>a</sup>, Dave E.  
Dunstan<sup>b</sup>, Nobuo Maeda<sup>a\*</sup>**

## Supplementary Materials

**Figure S1**

The **THF model hydrate** temperature formation distributions,  $T_f$  (subcooling,  $\Delta T$  /K) as a function of concentration of studied additives at 0.1MPa. The  $\Delta T$  of THF hydrates in pure water represents the baseline (the blue solid line =  $\Delta T$ ; the dashed lines =“error bars” of pure water). The “stochasticity” and the full width of experimentally measured distribution are represented by “error bars”.

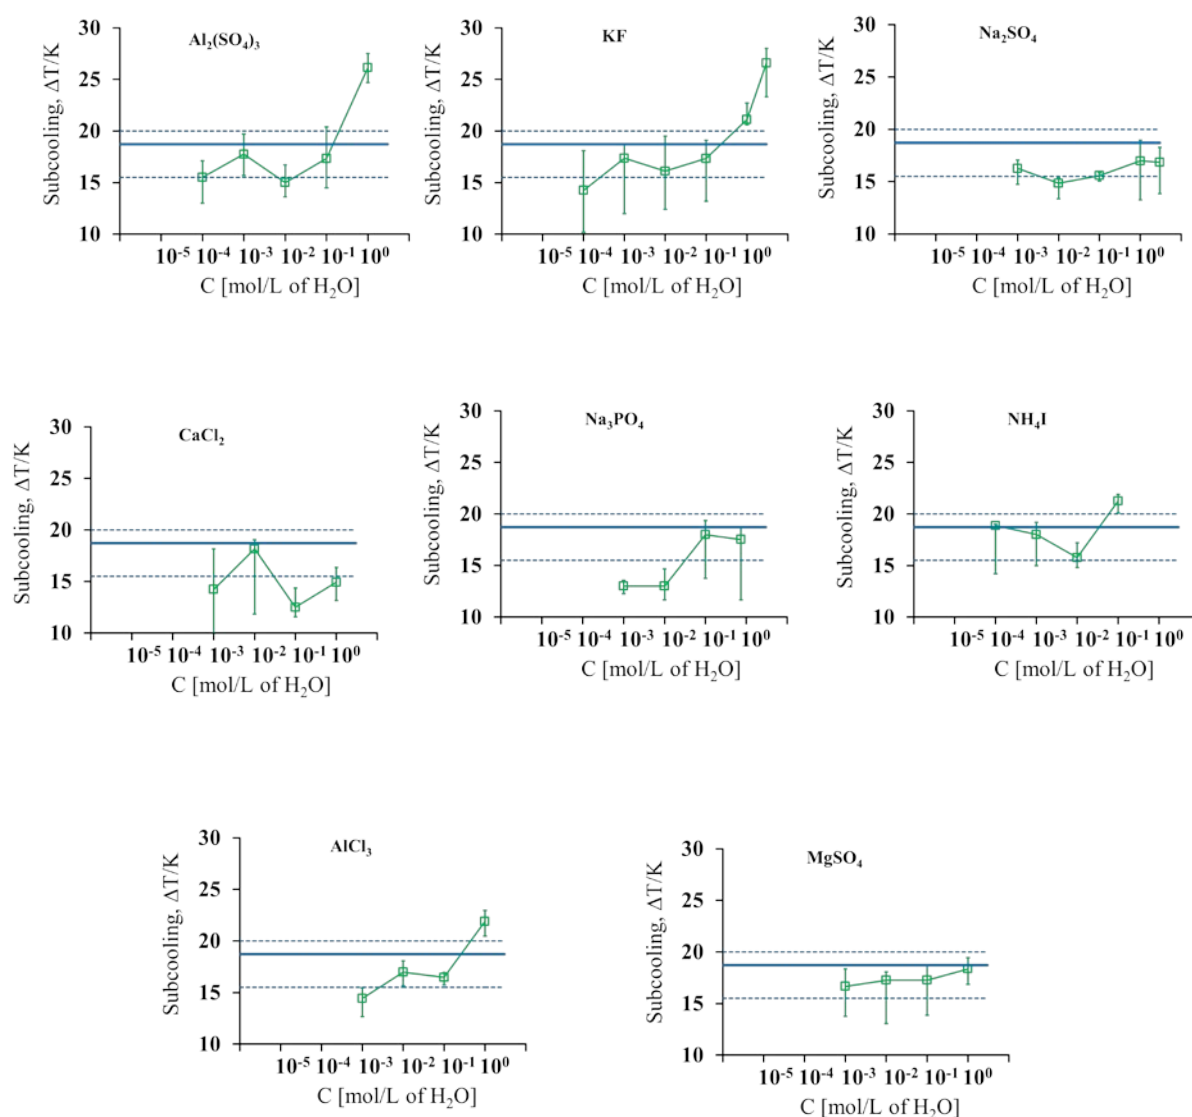

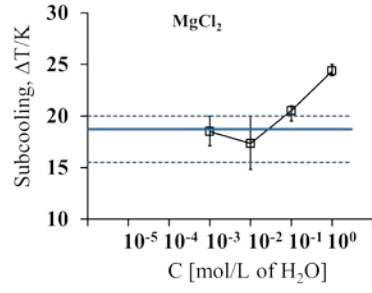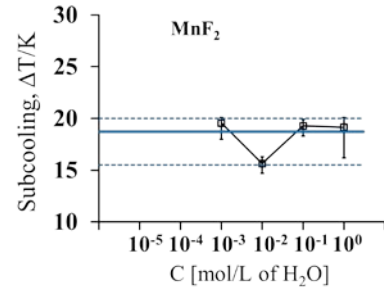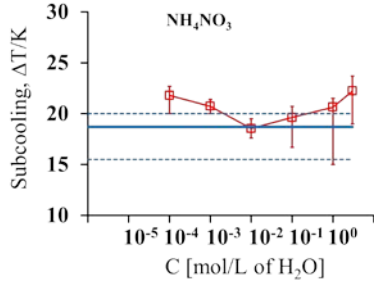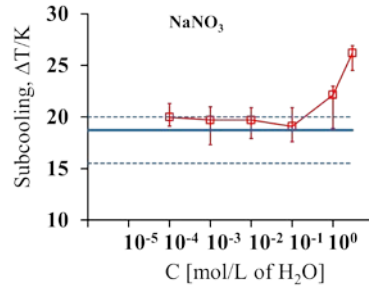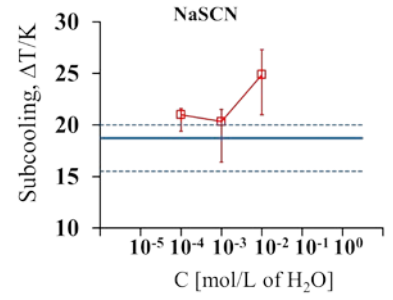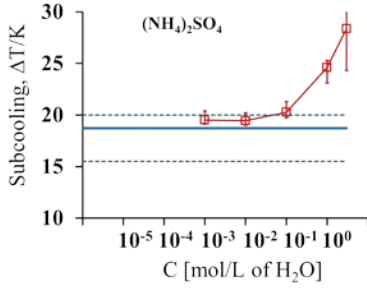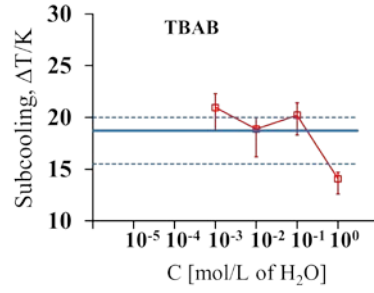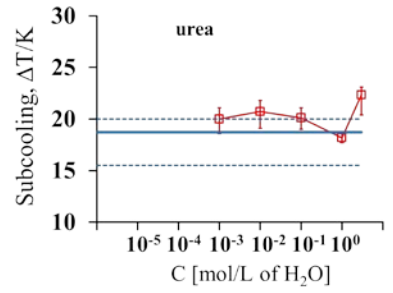

**Figure S2**

The **ice** temperature formation distributions  $T_f$  (Subcooling,  $\Delta T$  /K) as a function of concentration of studied additives at 0.1MPa. The  $\Delta T$  of ice from pure water represents the baseline (the blue solid line =  $\Delta T$ ; the dashed lines =“error bars” of pure water). The “stochasticity” and the full width of experimentally measured distribution are represented by “error bars”.

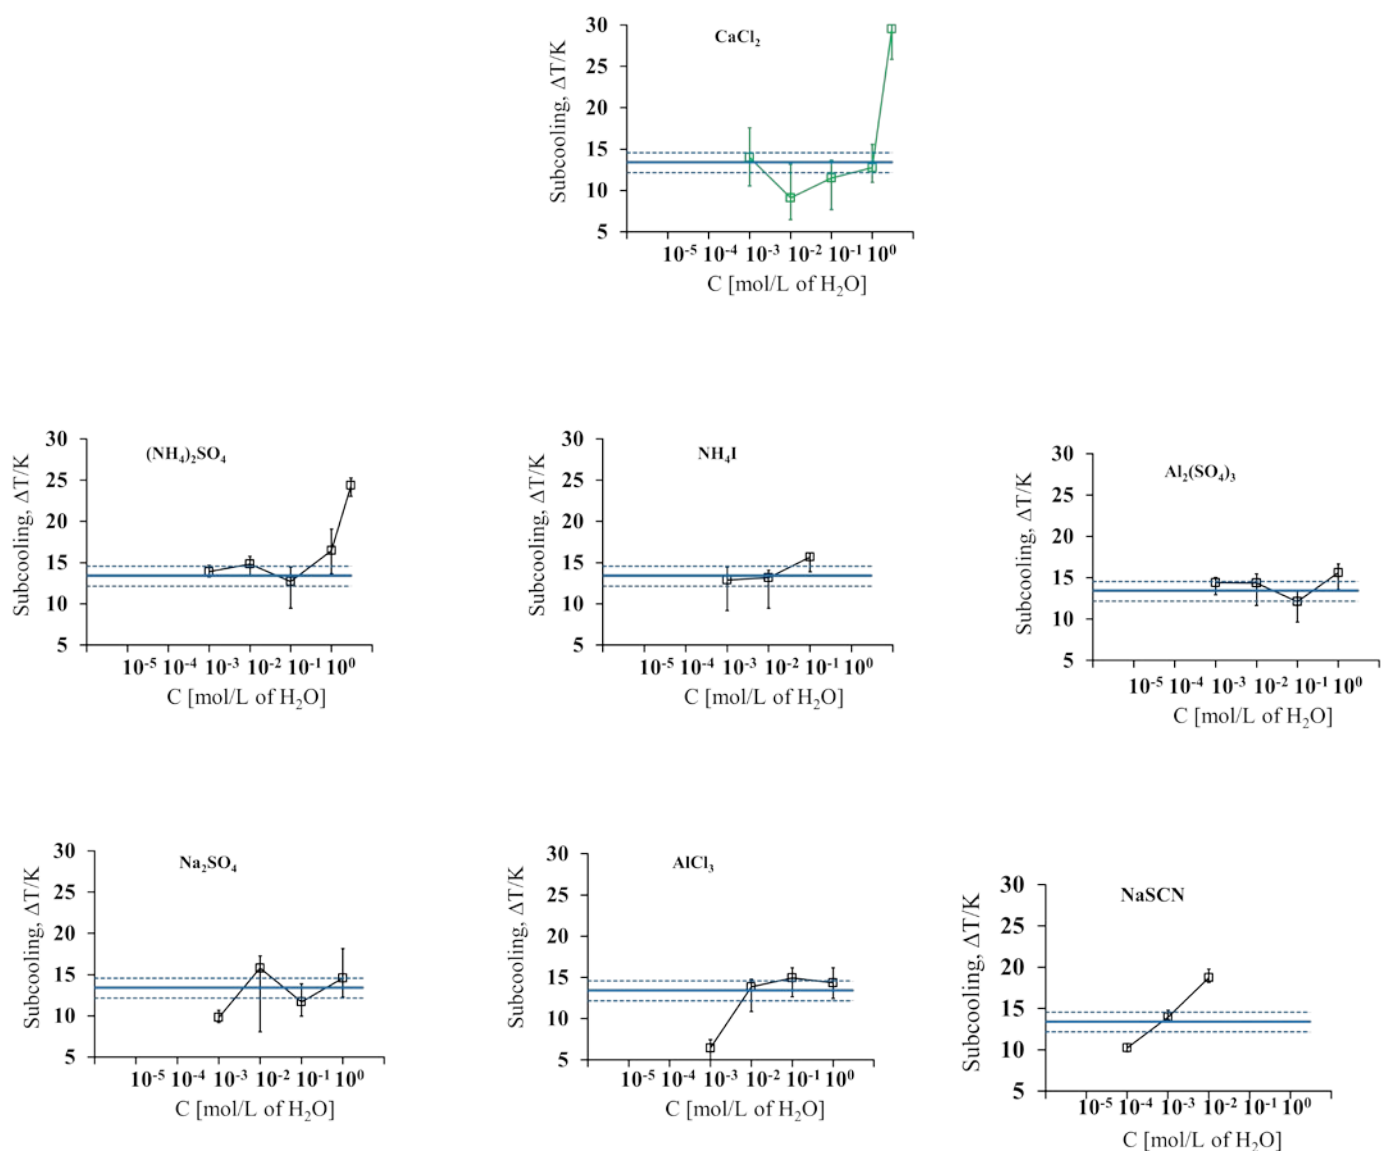

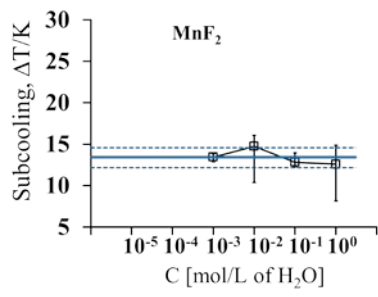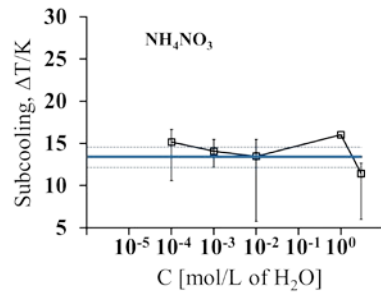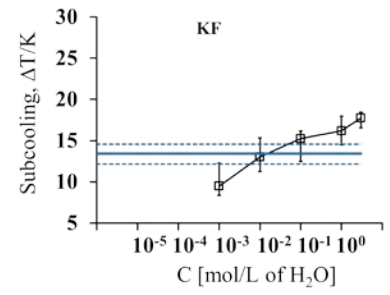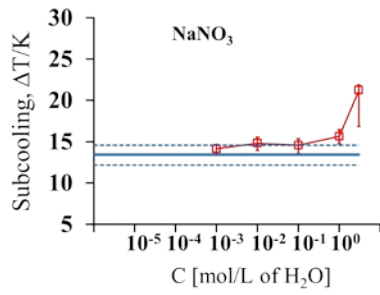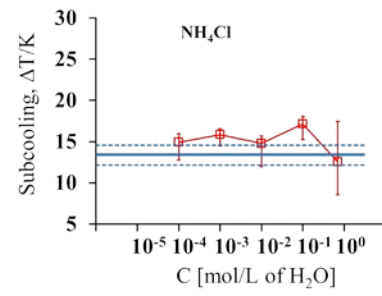

Supplement: Supplementary file 1 [file 3626097]
